# Supplementary material for: Pretreatment Tumor Growth Rate and Radiological Response as Predictive Markers of Pathological Response and Survival in Patients with Resectable Lung Cancer Treated by Neoadjuvant Treatment
Source: MDPI journal article supplement (doi:10.3390/cancers15164158), 2023-08-17
Supplement: s1 [file s1]

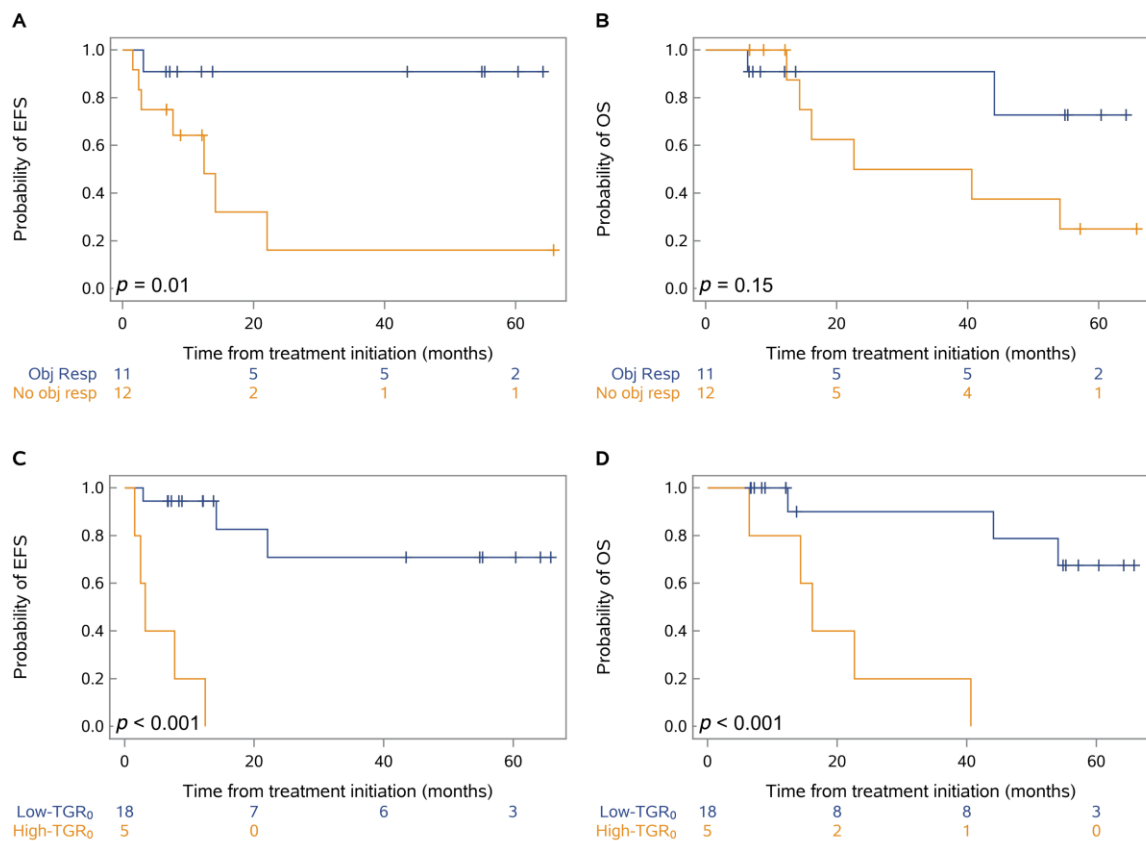

**Figure S1.** Kaplan–Meier analysis of event-free survival (EFS) and overall survival (OS) by RECIST objective response of the primary tumor (**A,B**) and pretreatment TGR0 (**C,D**) in a subgroup of patients treated by neoadjuvant nivolumab-based therapy.  $p$ -values were obtained using the log-rank test.

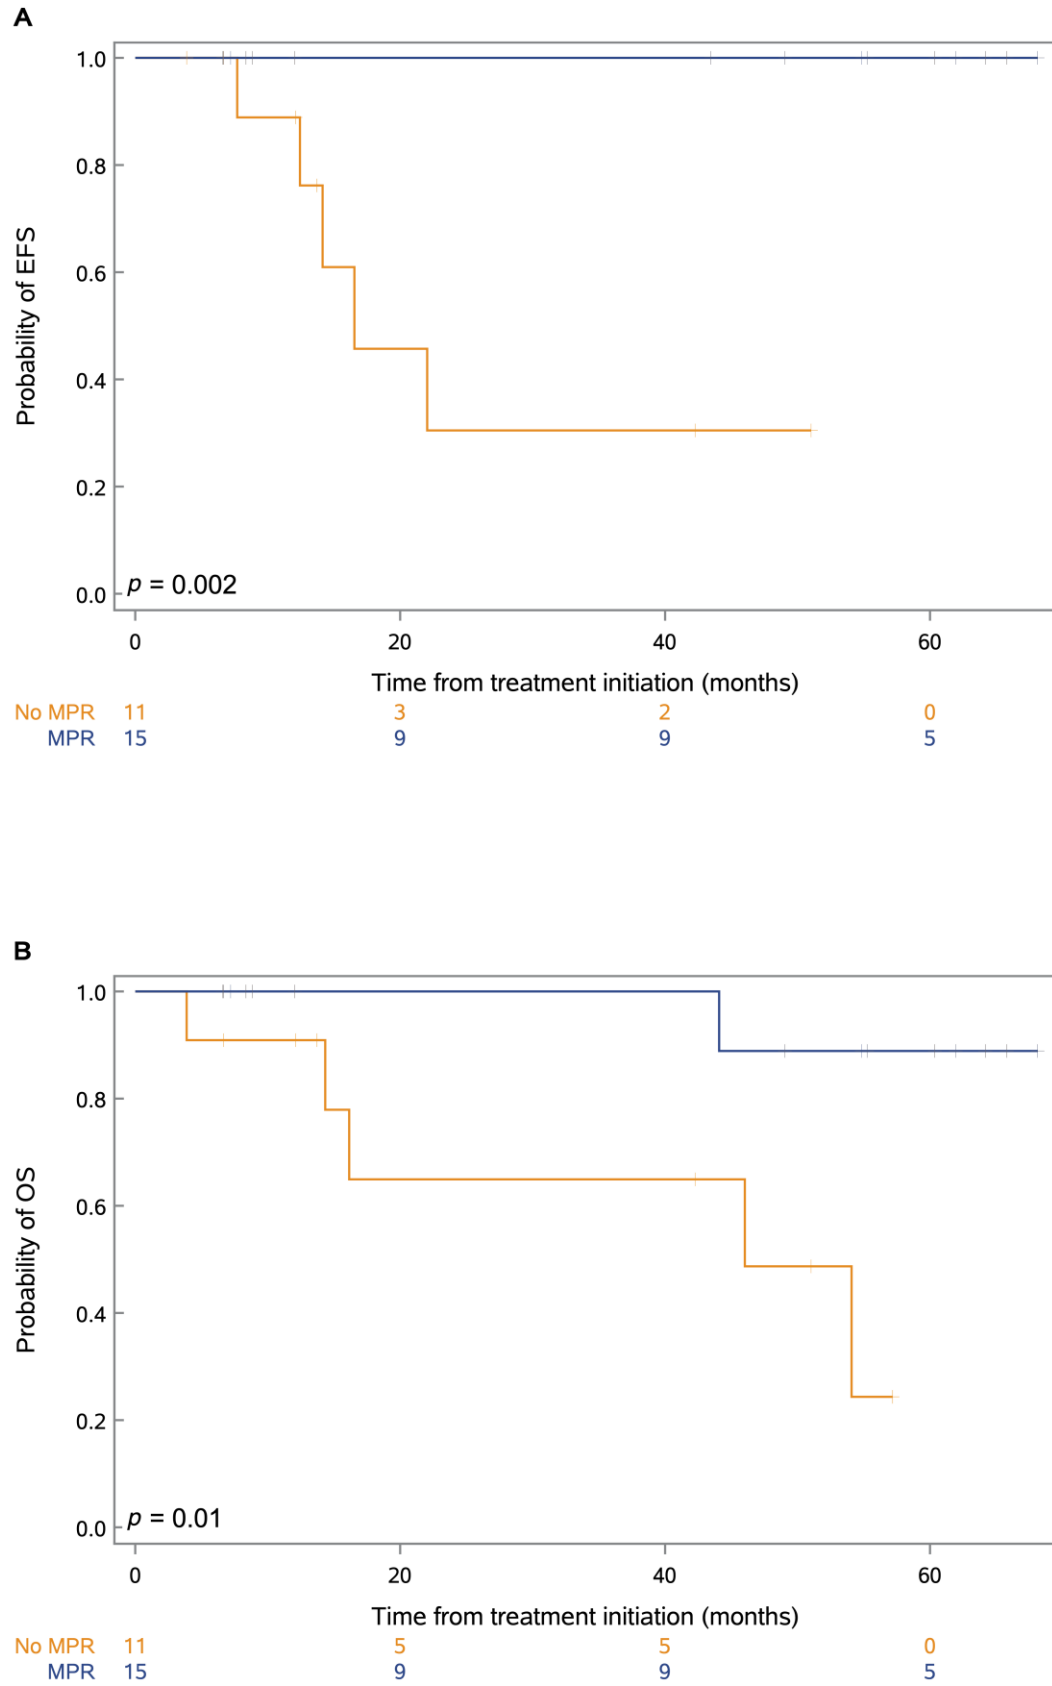

**Figure S2.** Kaplan–Meier analysis of event-free survival (**A**) and overall survival (**B**) by major pathological response (MPR).  $p$ -values were obtained using the log-rank test. EFS: event-free survival; OS: overall survival..
